# Supplementary material
Source: PubMed Central journal article supplement (PMC7279955)
Supplement: EMS85829-supplement-Supplementary_Figure_1.pdf [file EMS85829-supplement-Supplementary_Figure_1.pdf]

Figure 2e

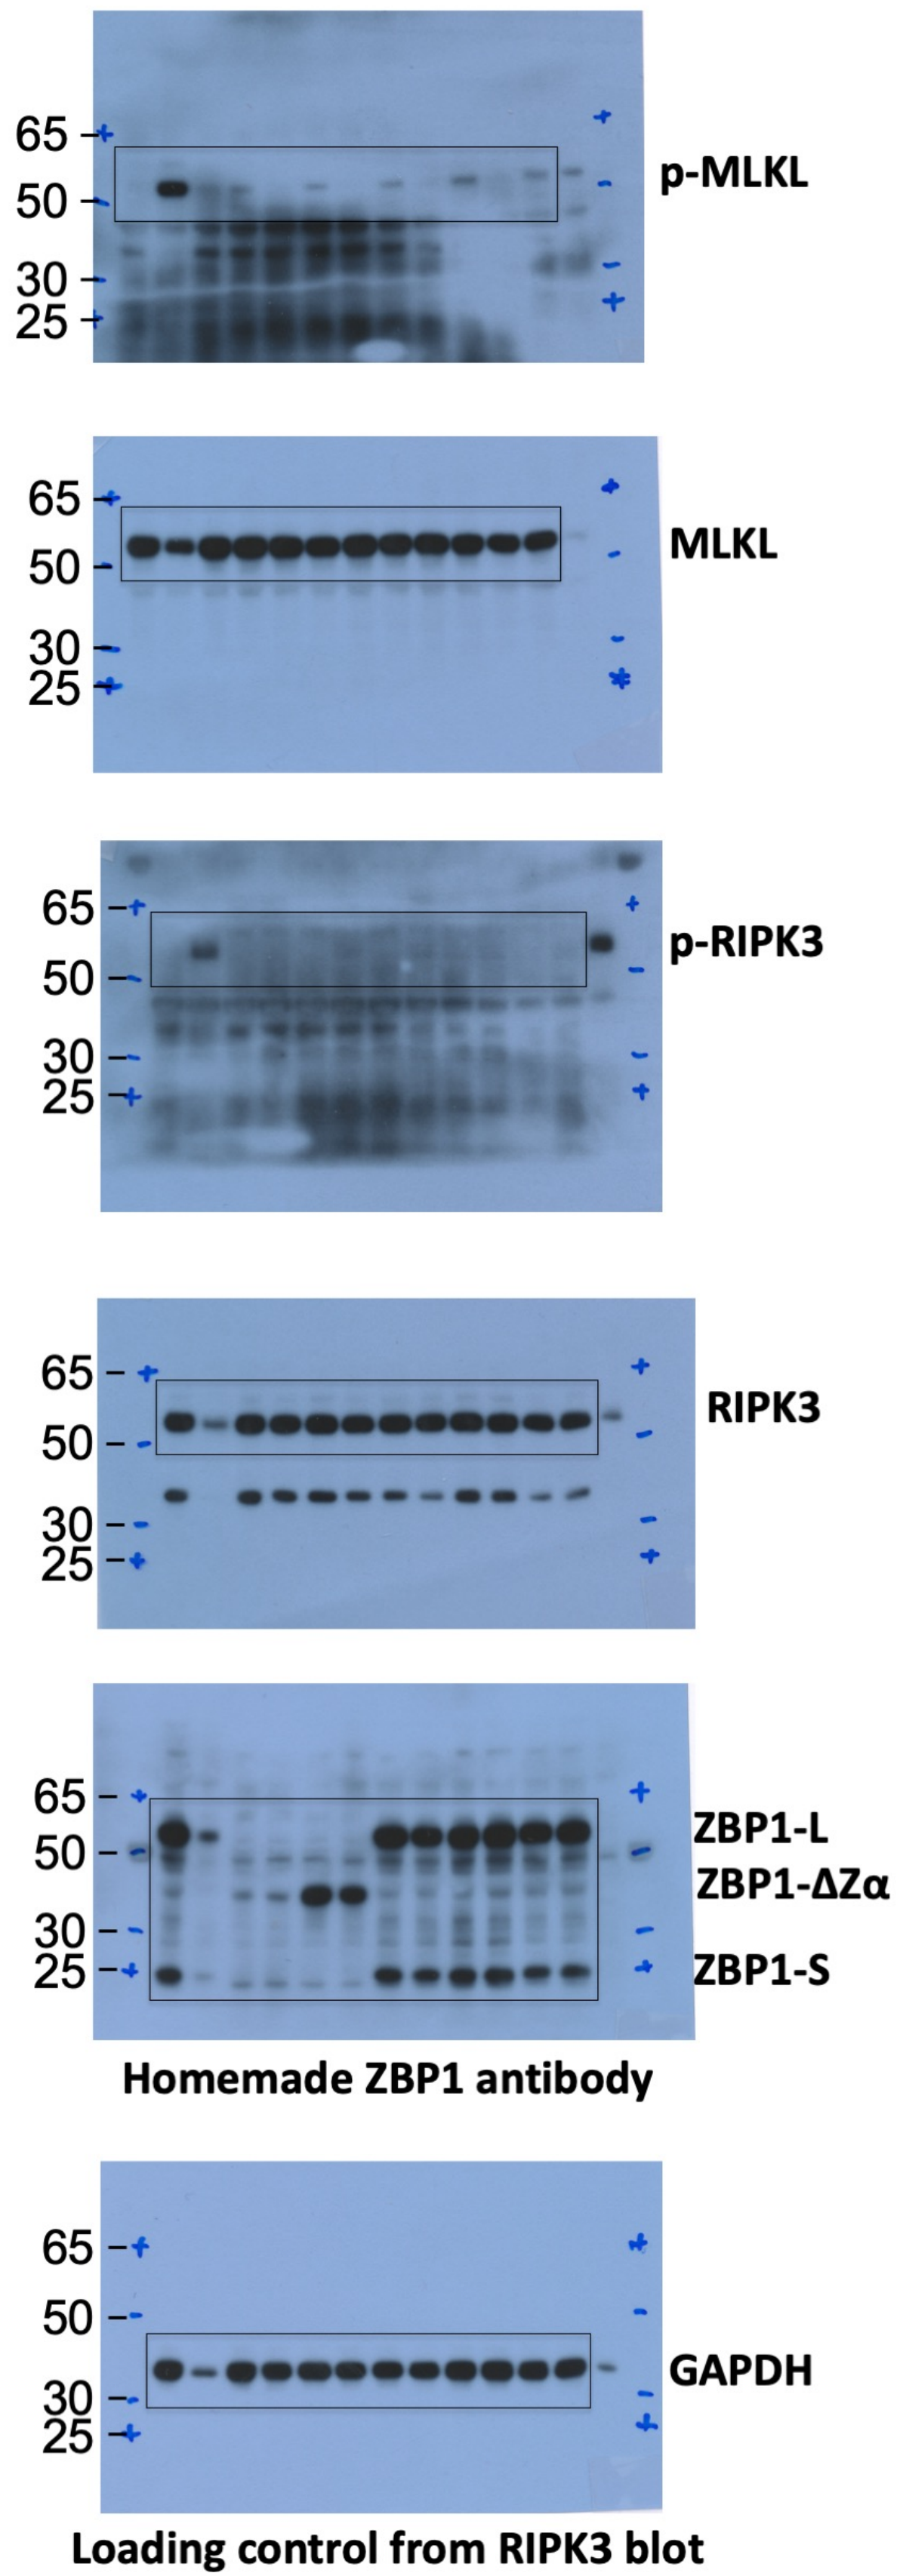

Figure 2g

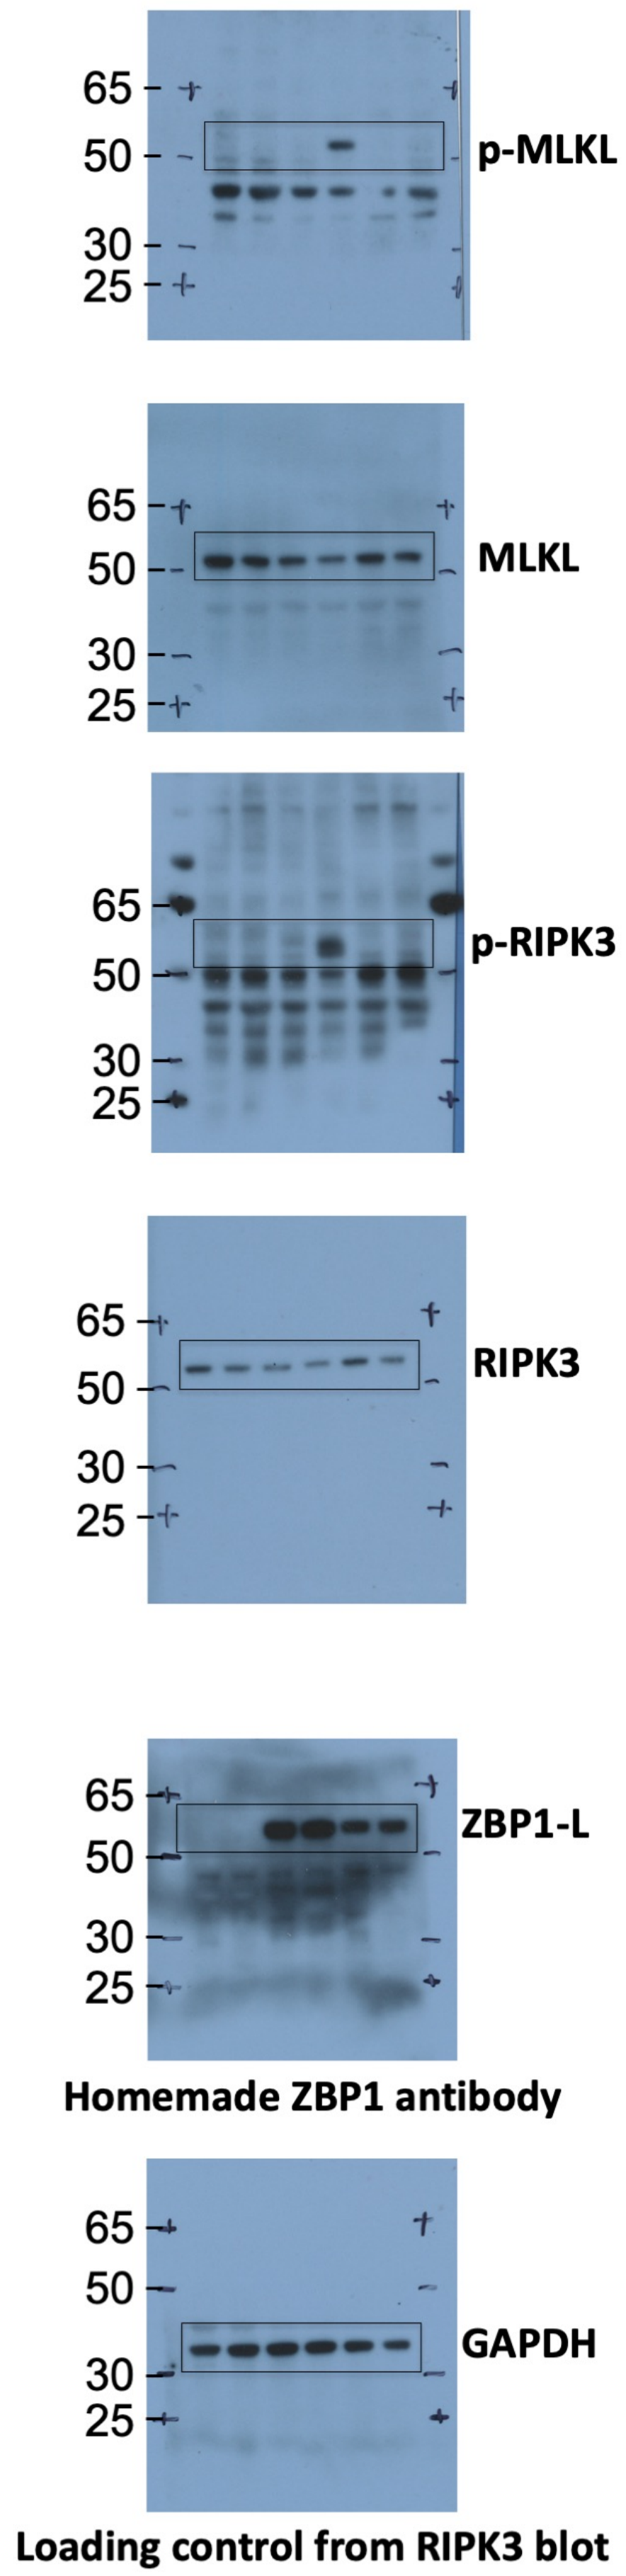

Figure 2h

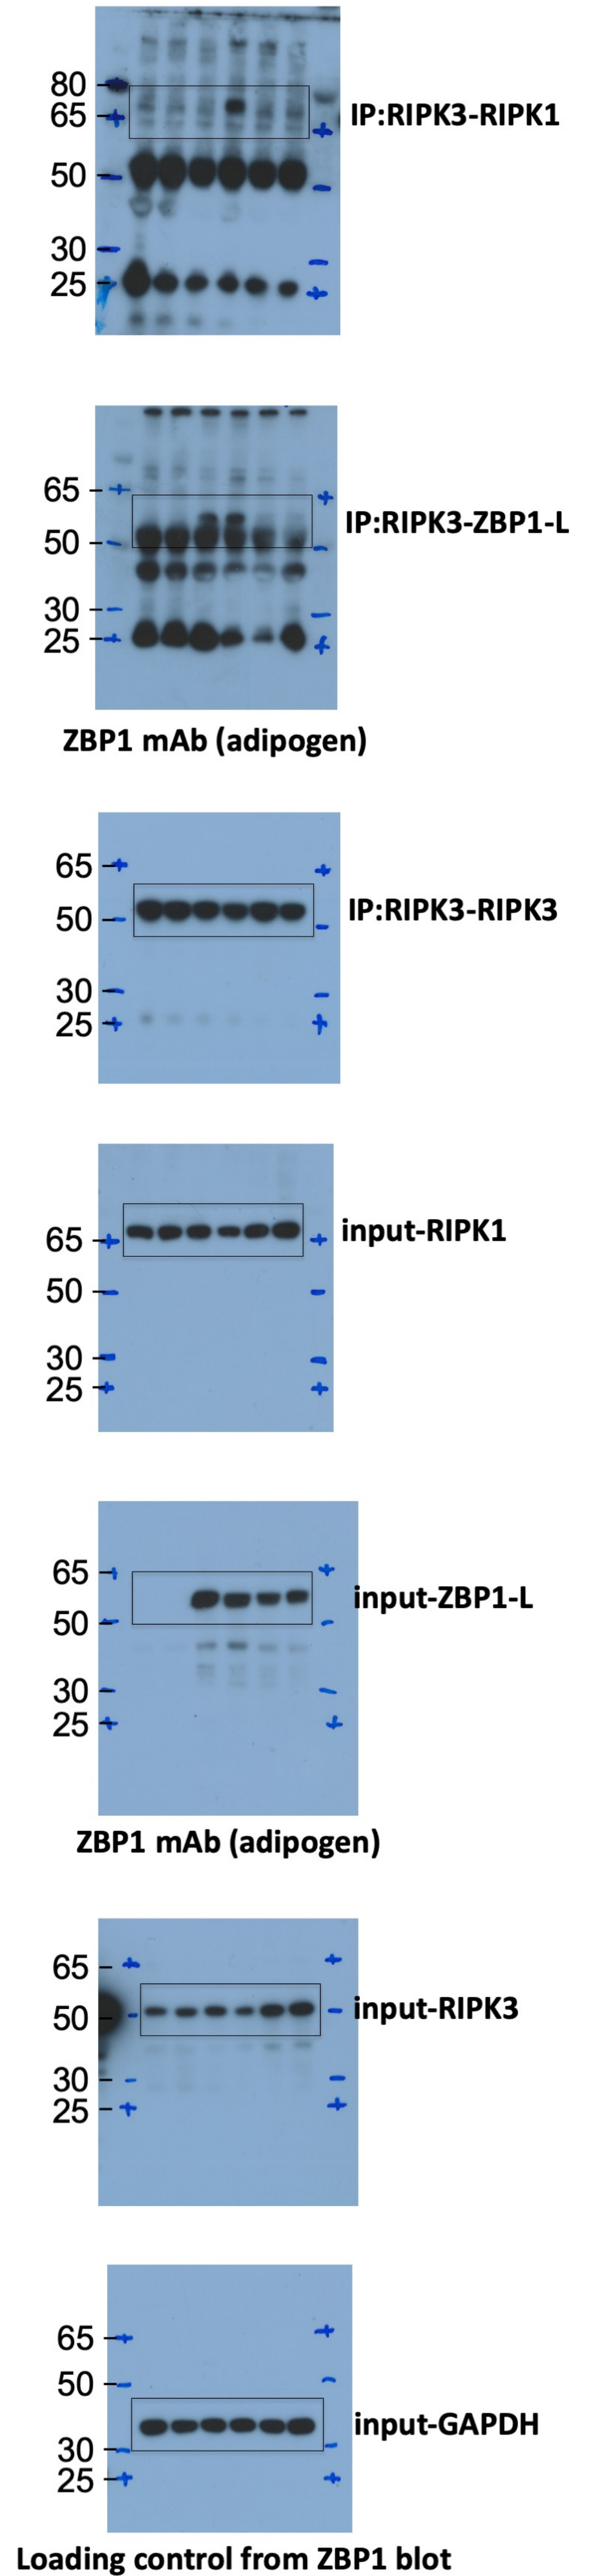



**Figure 3a**

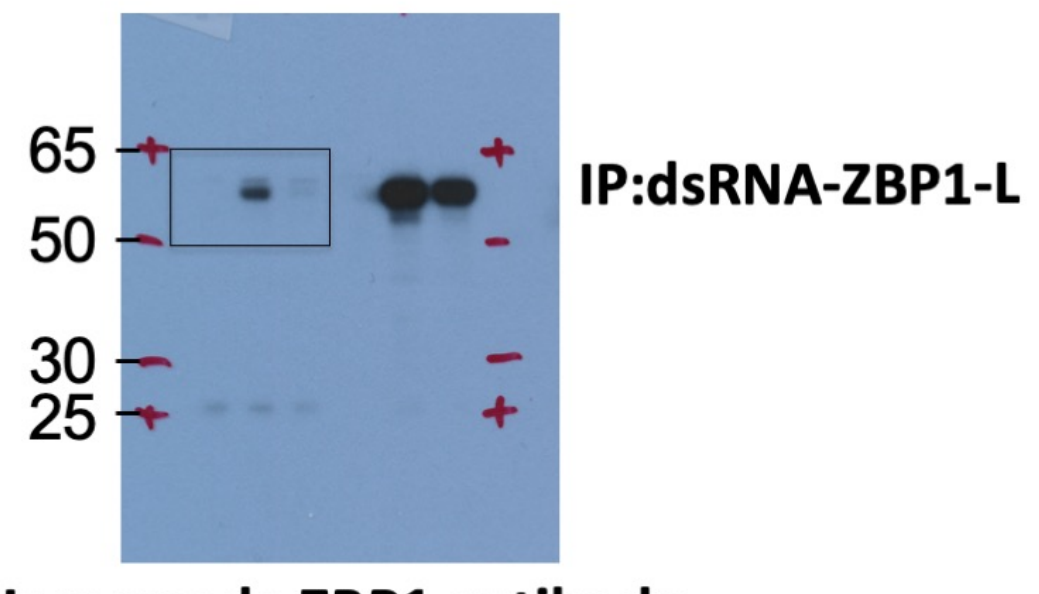

**Homemade ZBP1 antibody**

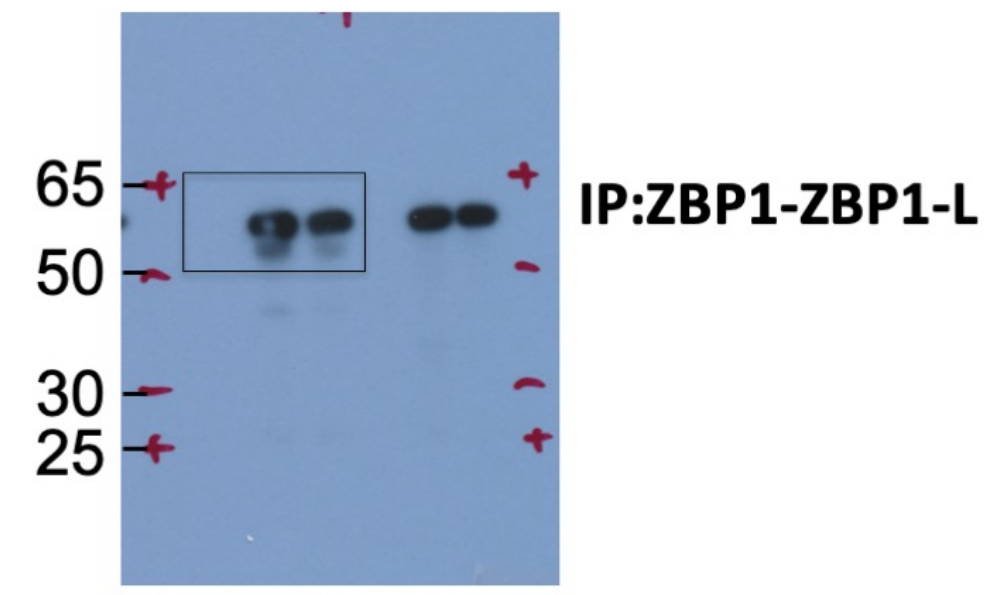

**ZBP1 mAb (adipogen)**

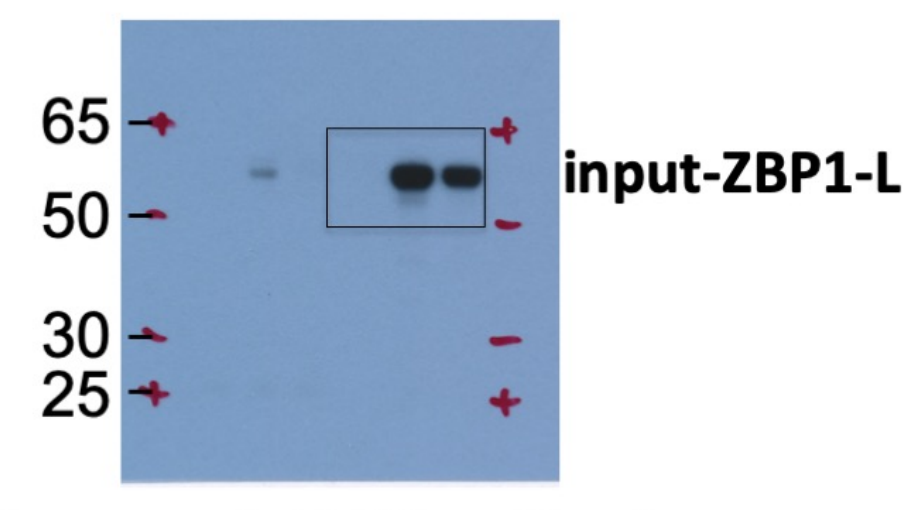

**Homemade ZBP1 antibody**



**Figure 4b**

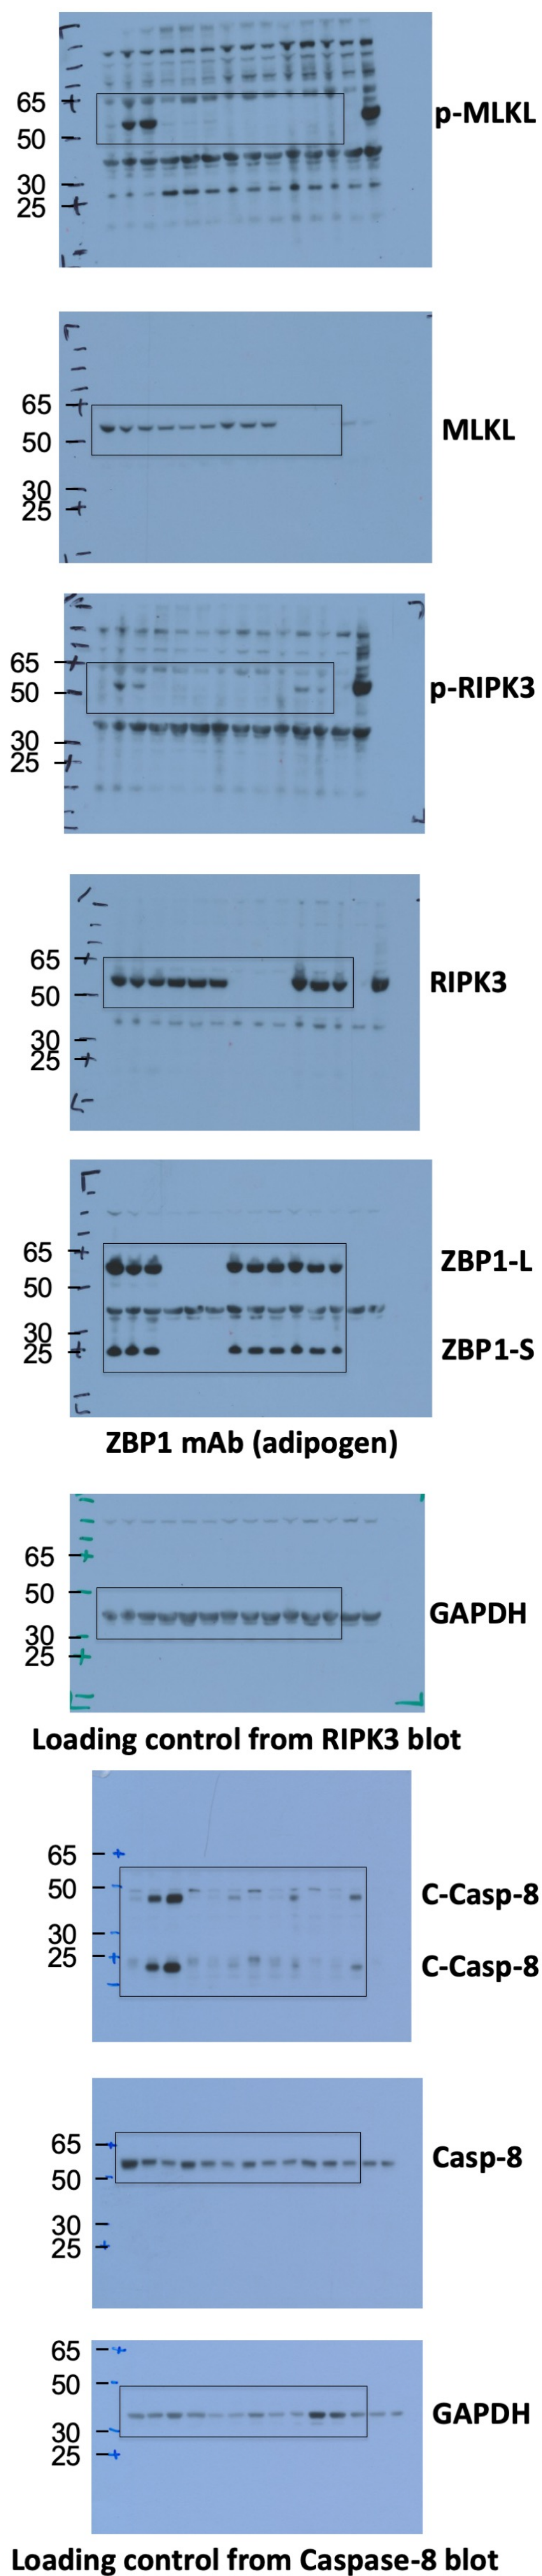

**Figure 4c**

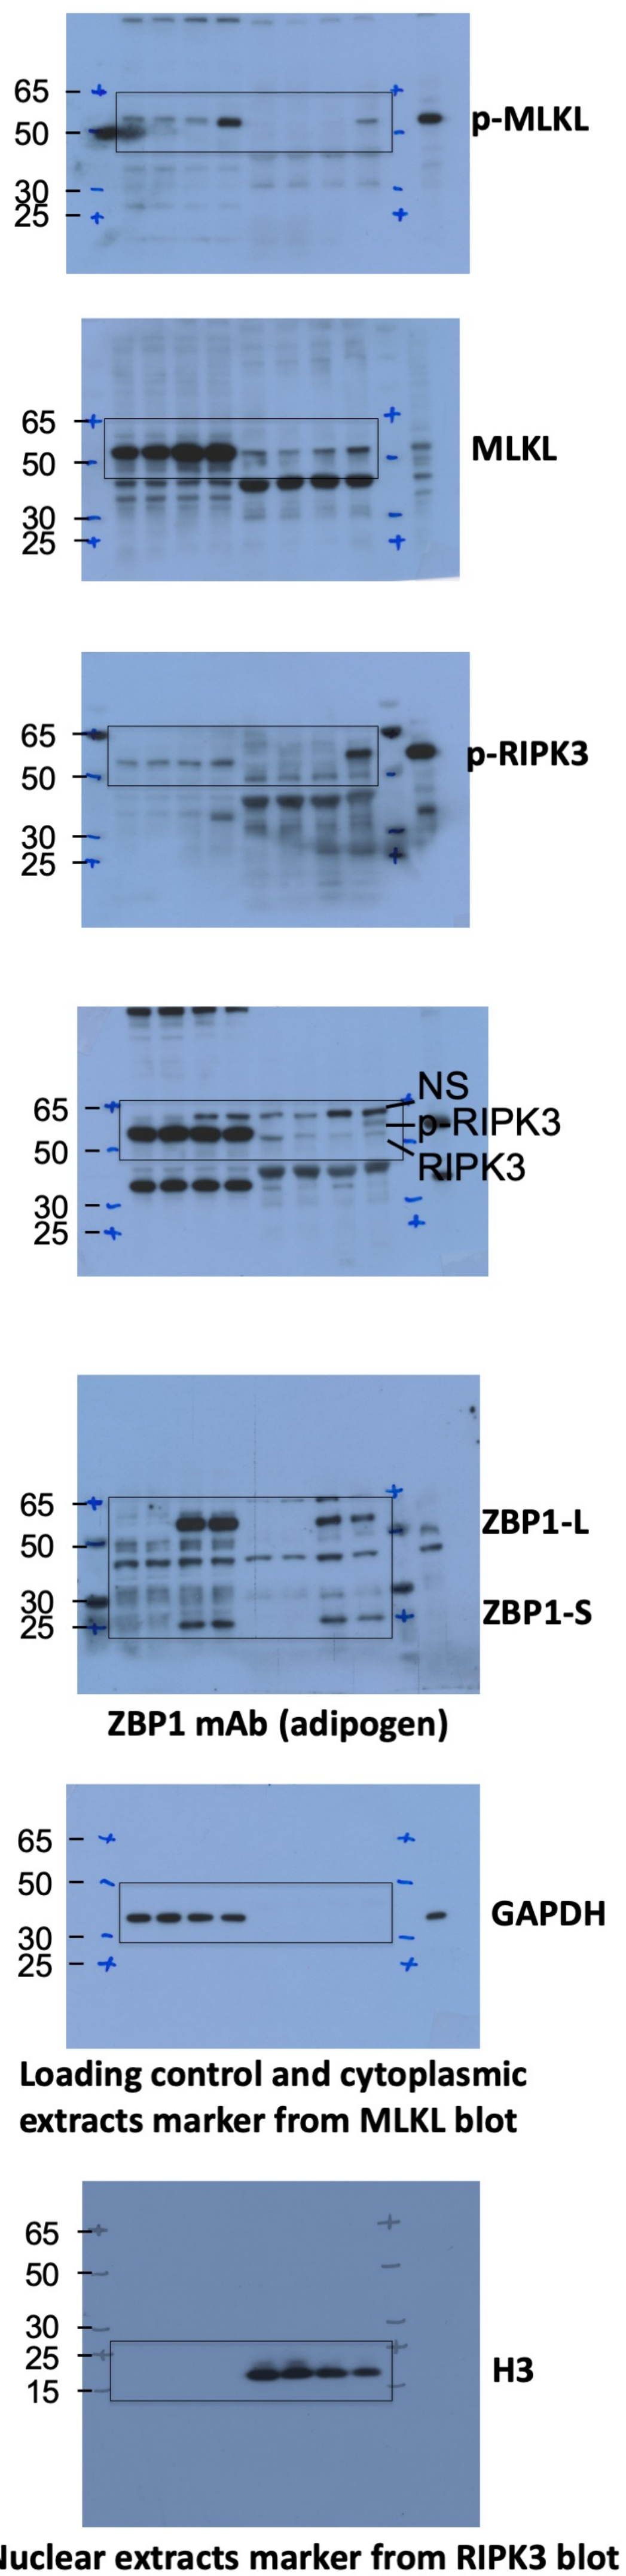

**Figure 4d**

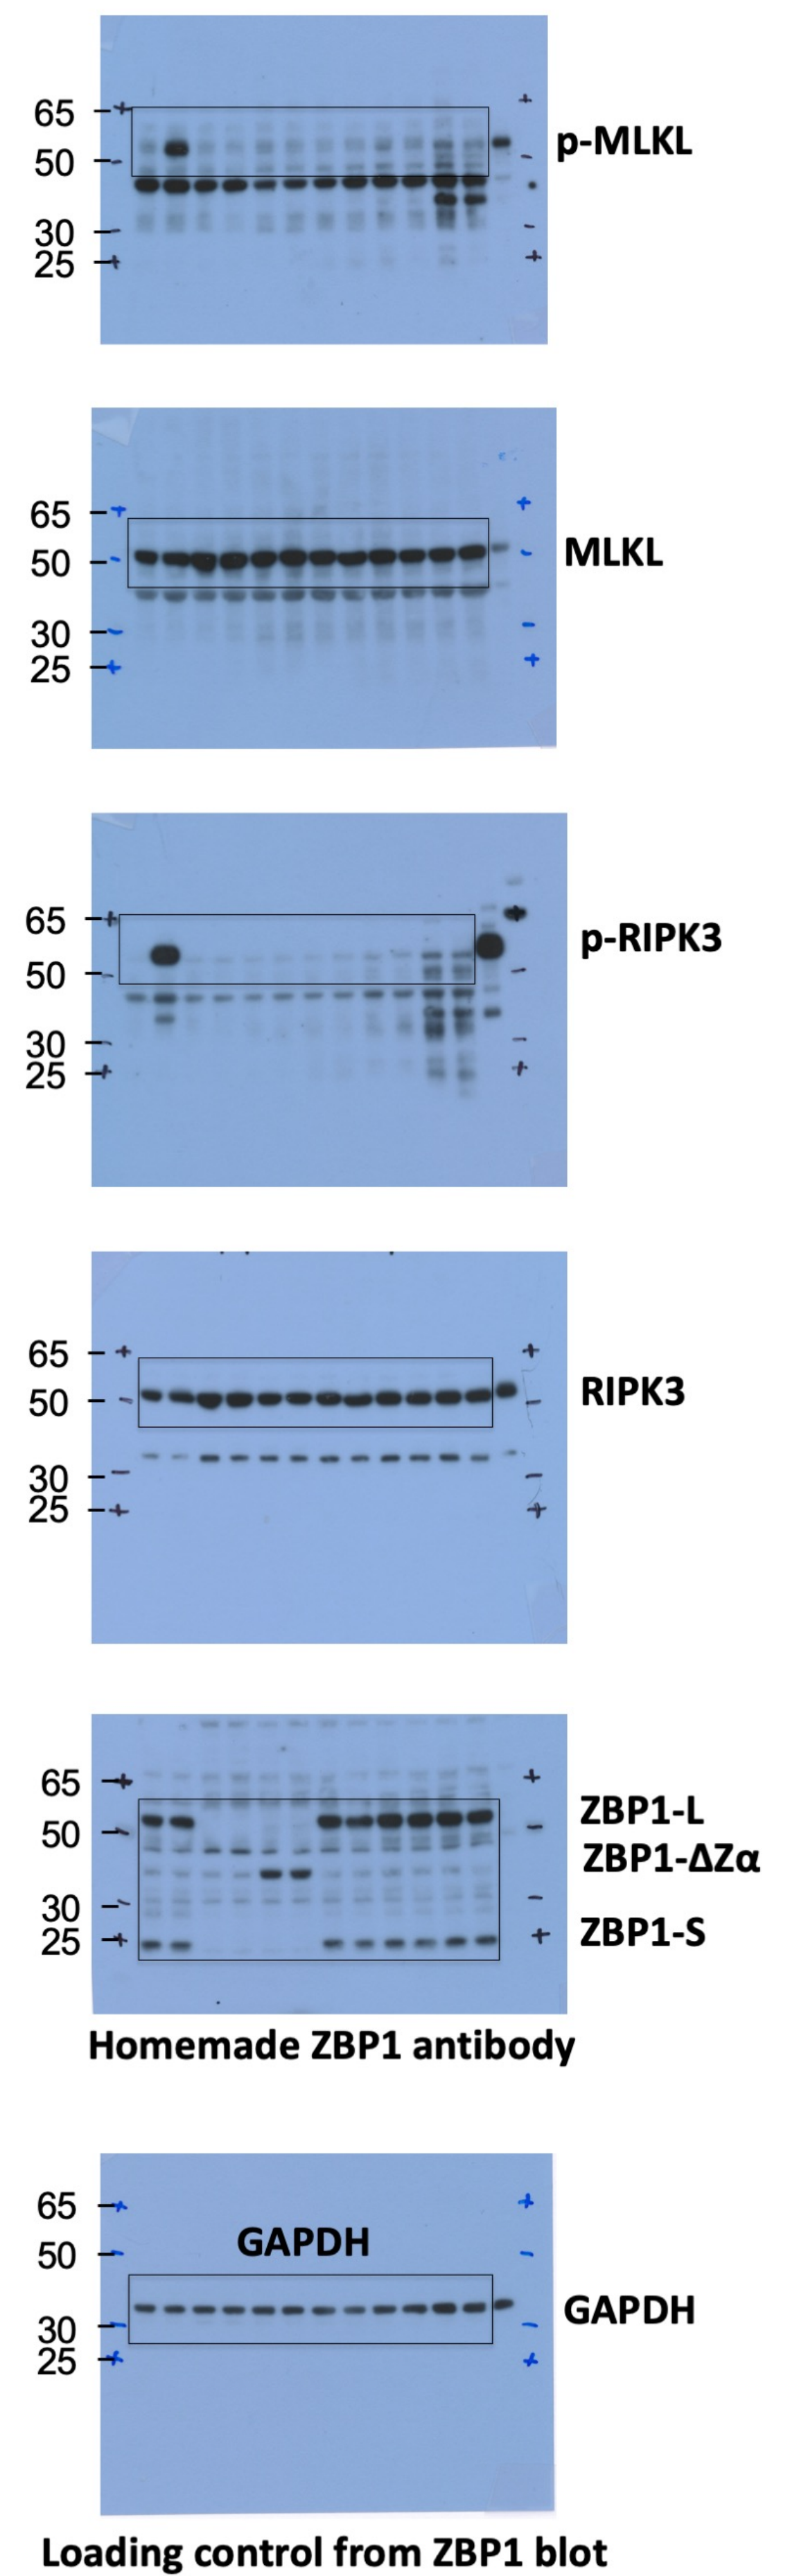



**ED Figure 1f**

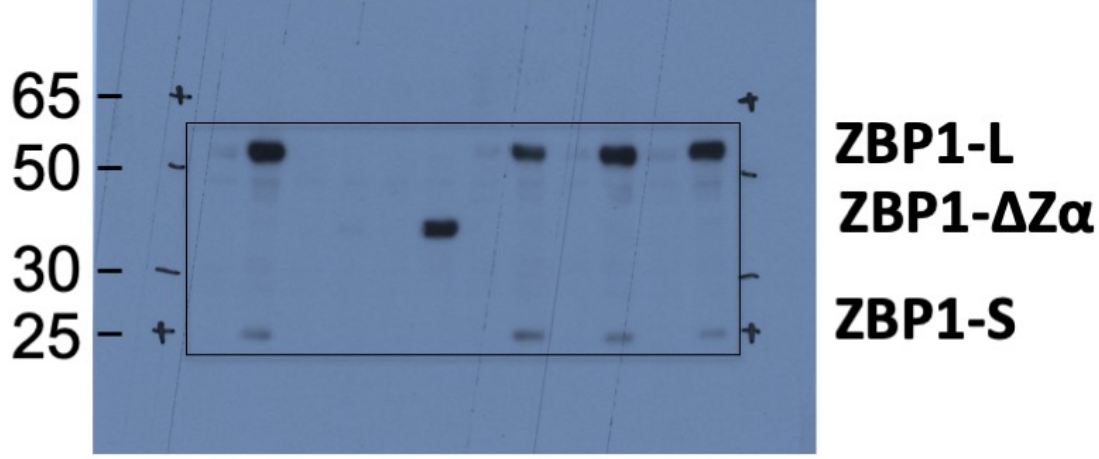

**Homemade ZBP1 antibody**

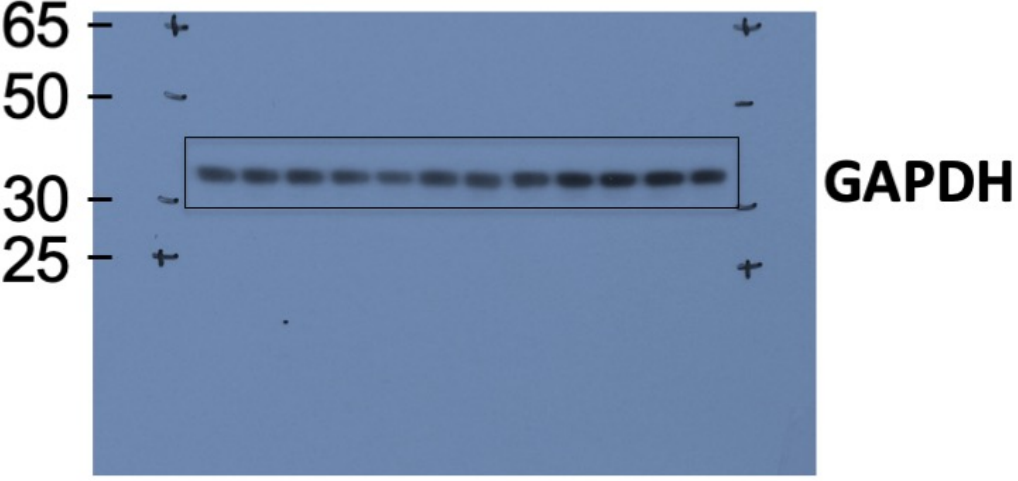

**Loading control from ZBP1 blot**

**ED Figure 2b**

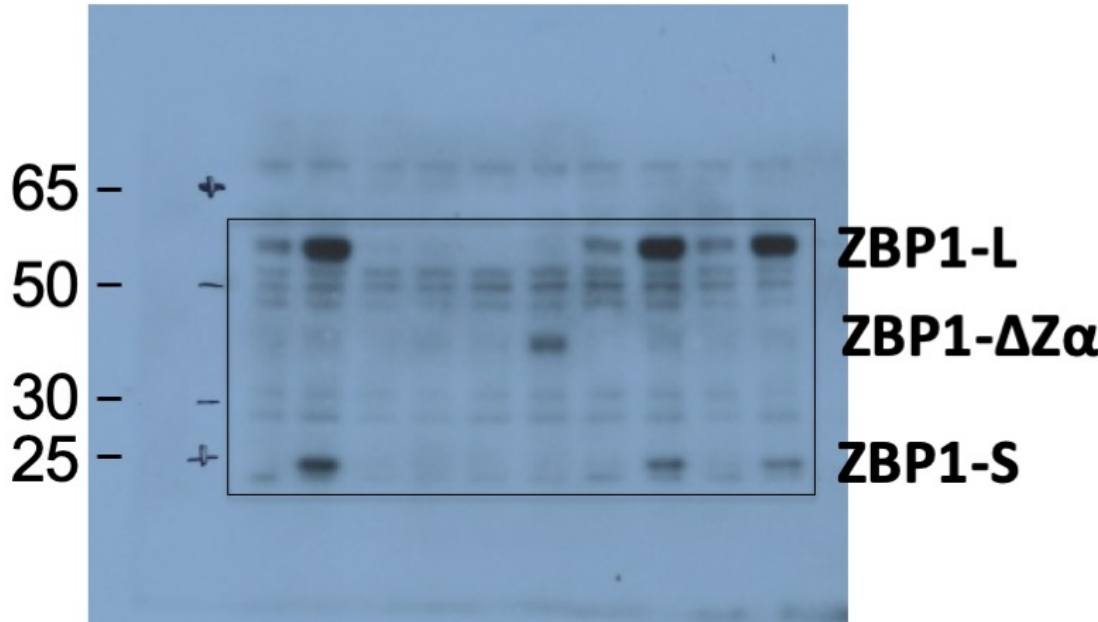

**Homemade ZBP1 antibody**

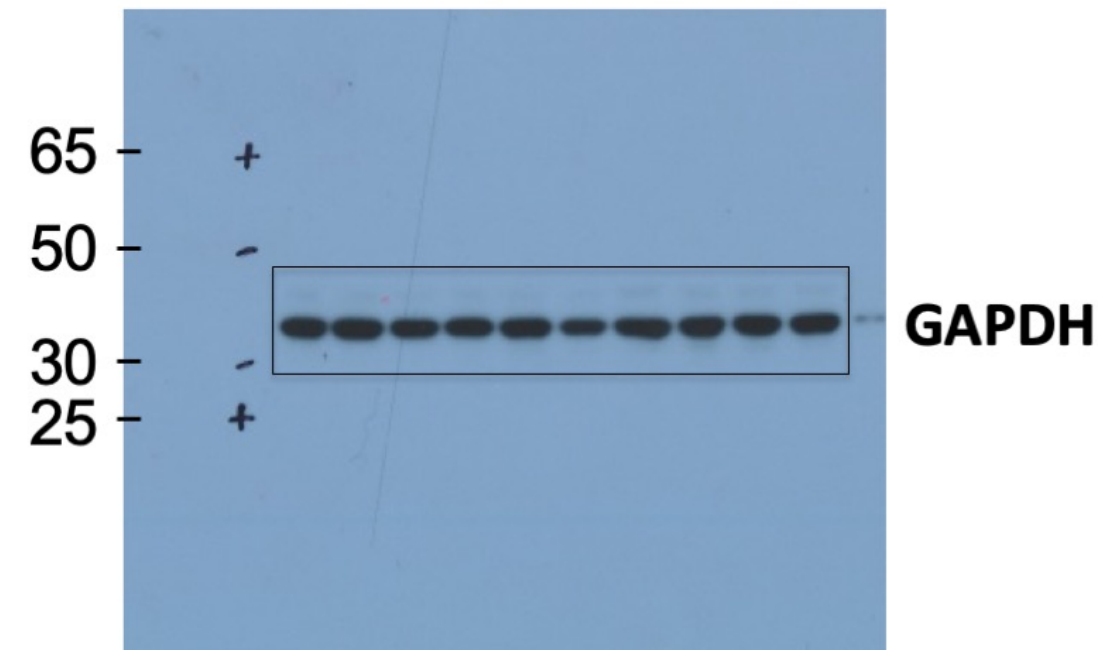

**Loading control from ZBP1 blot**

ED Figure 4b

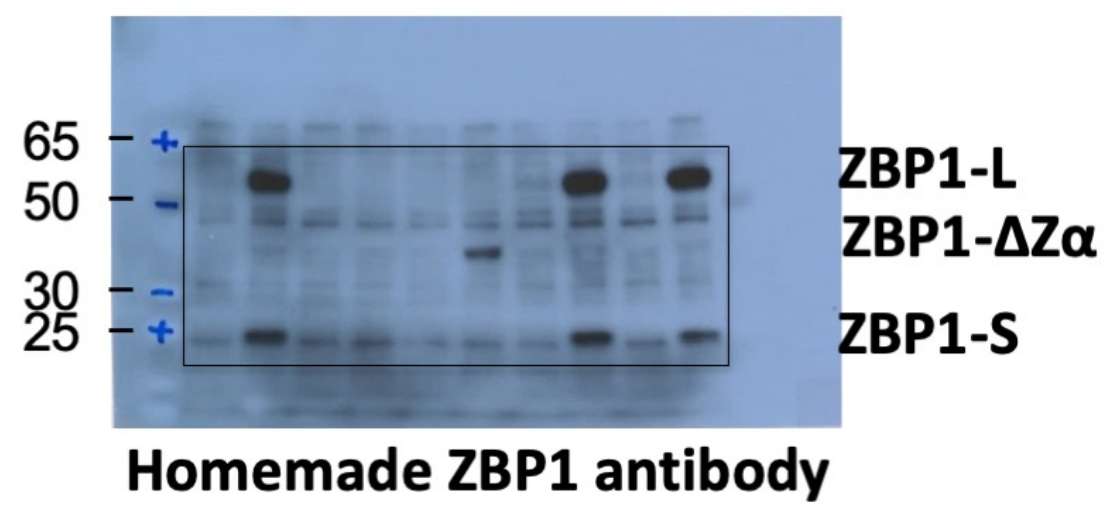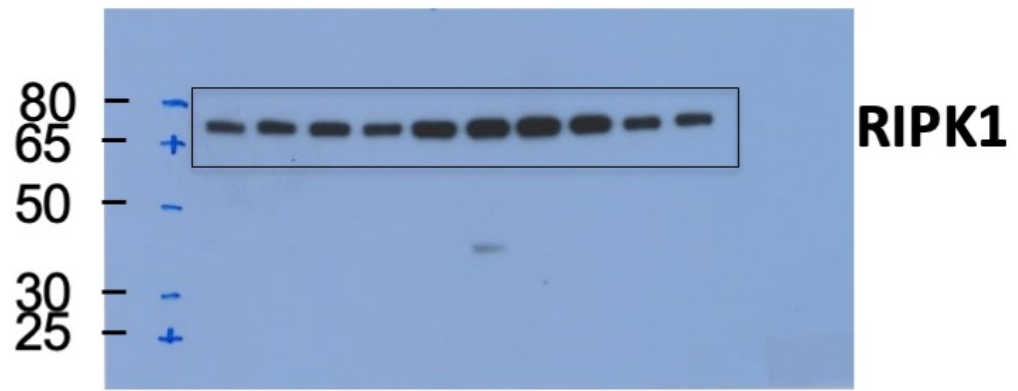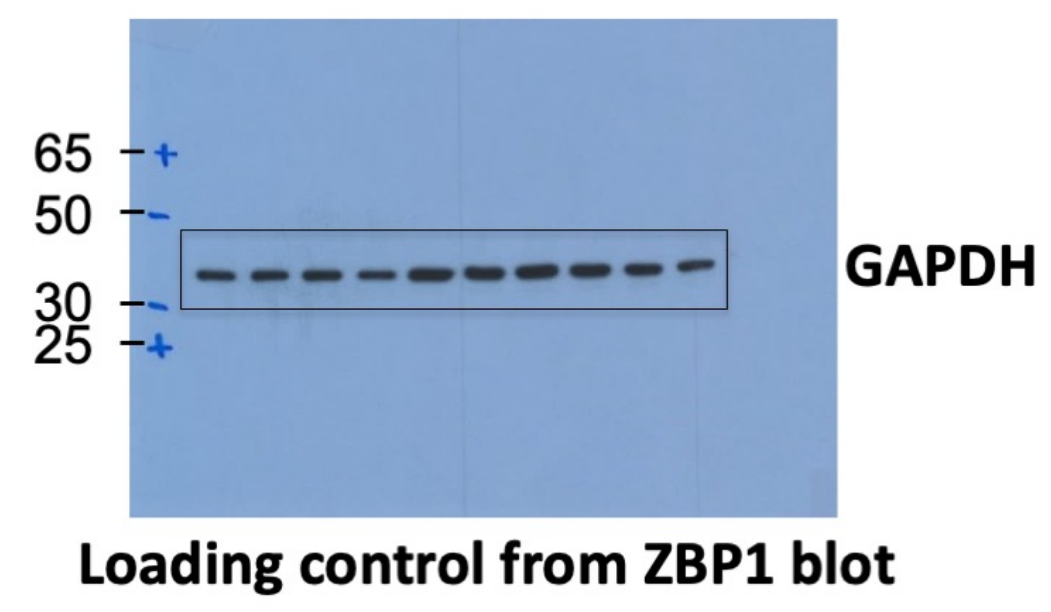

ED Figure 4c

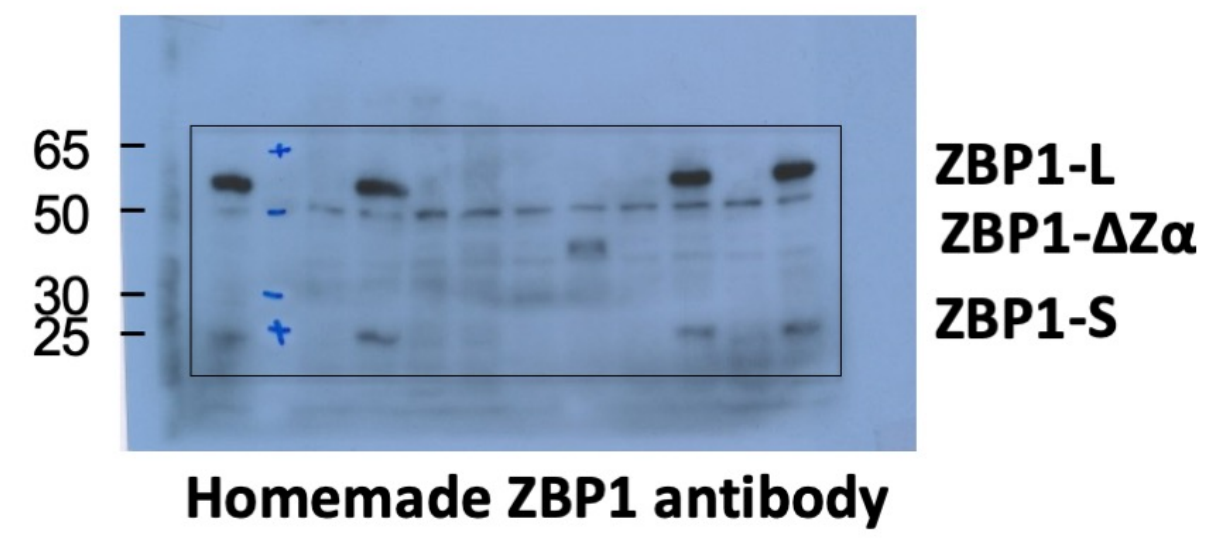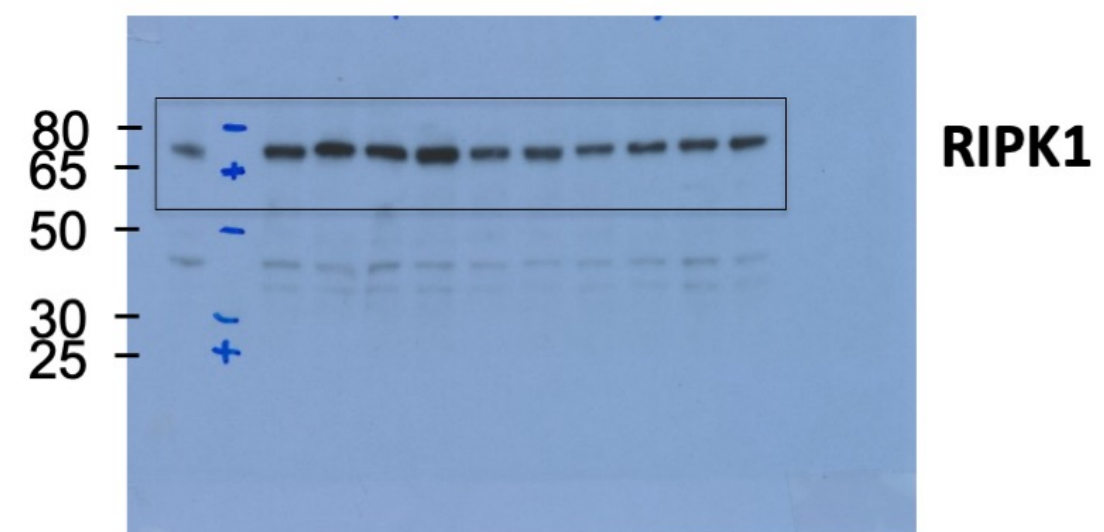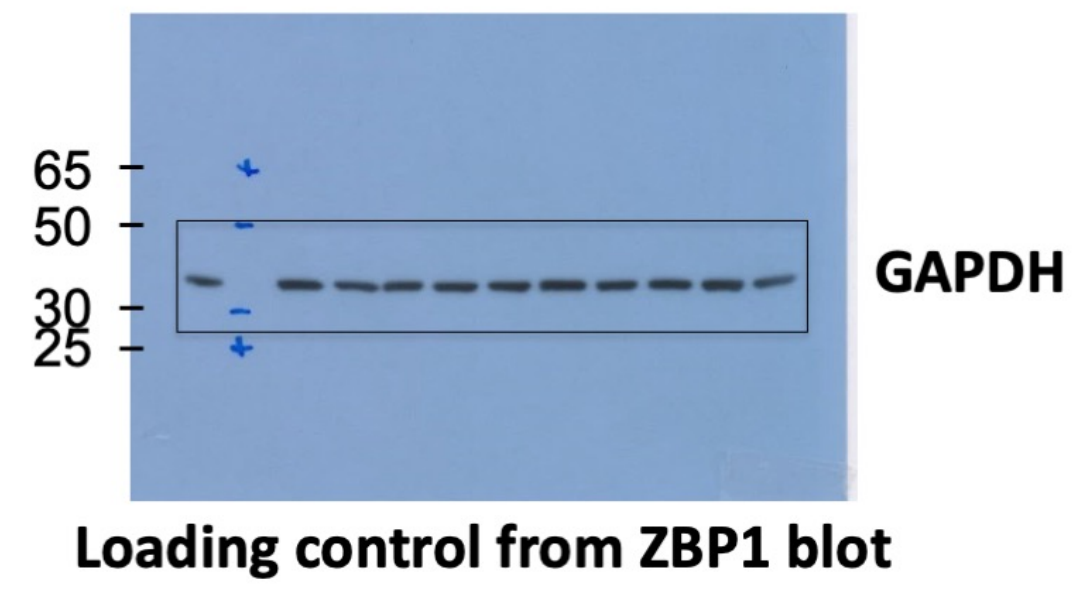

**Figure 5g**

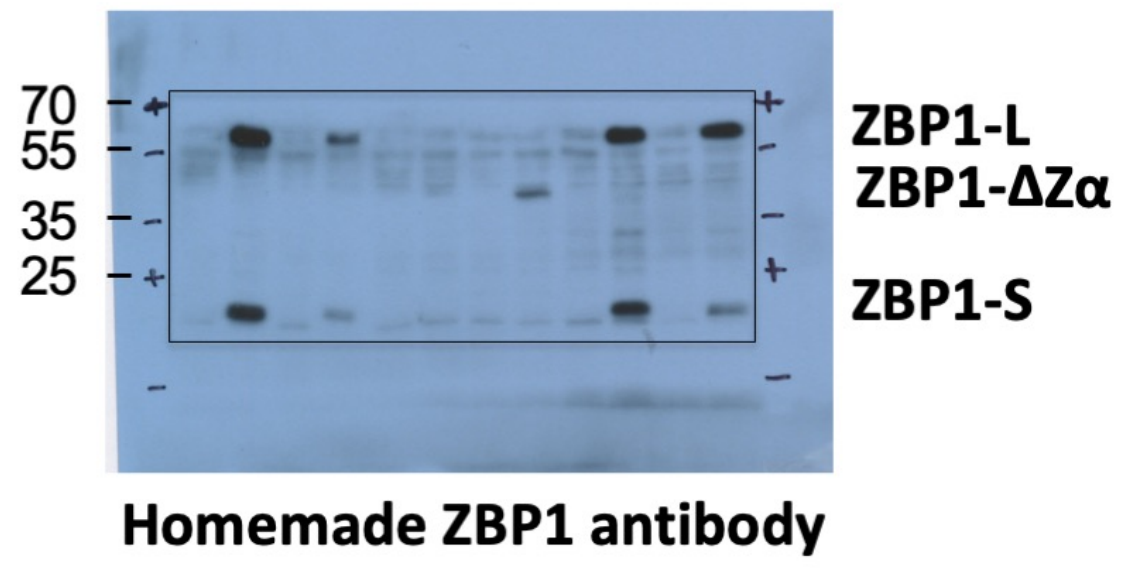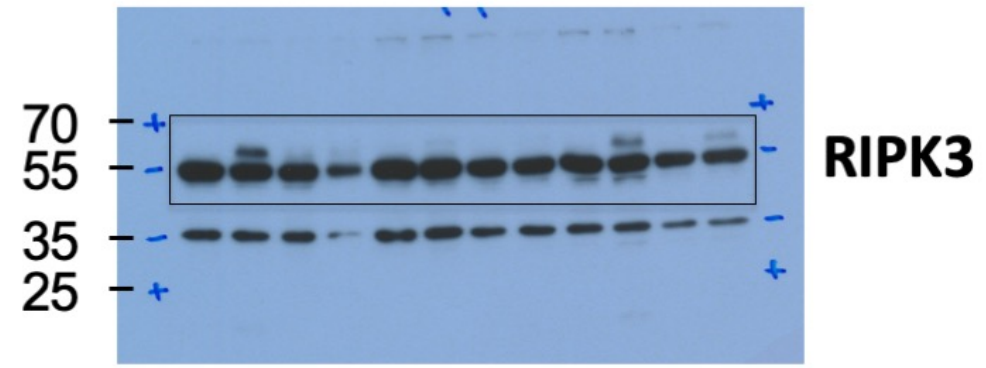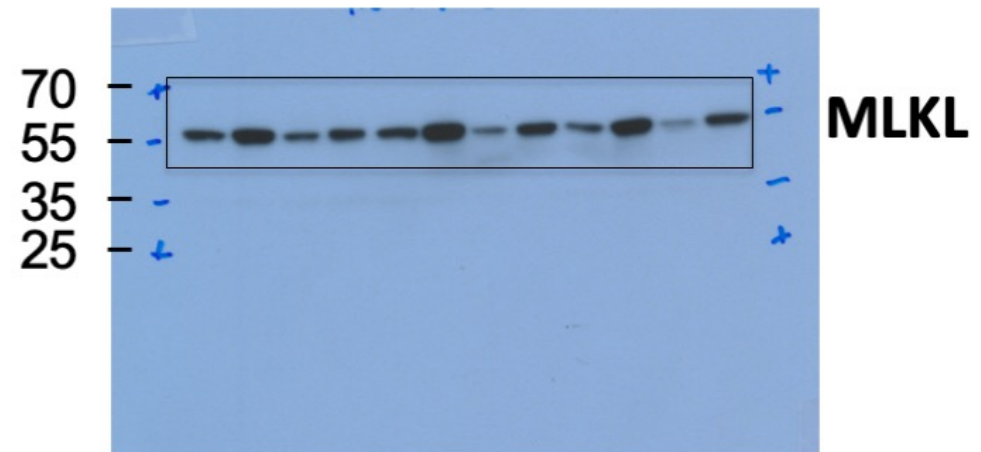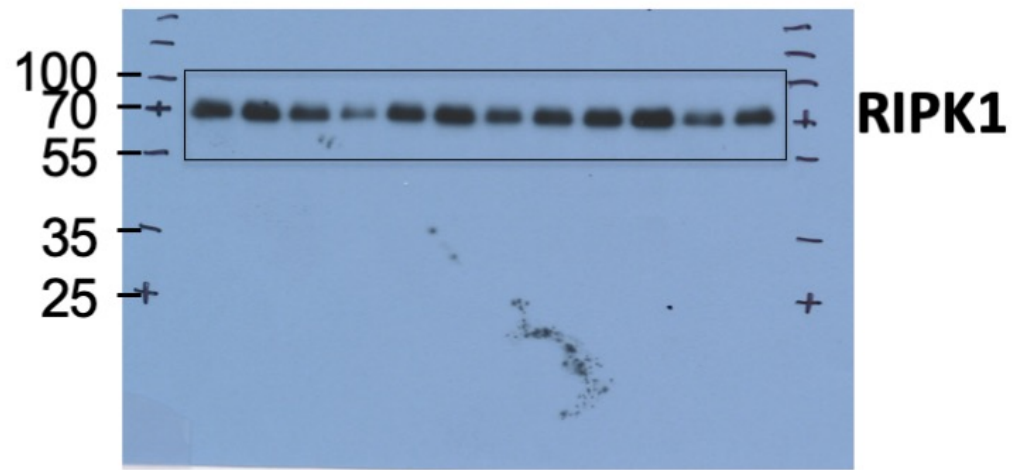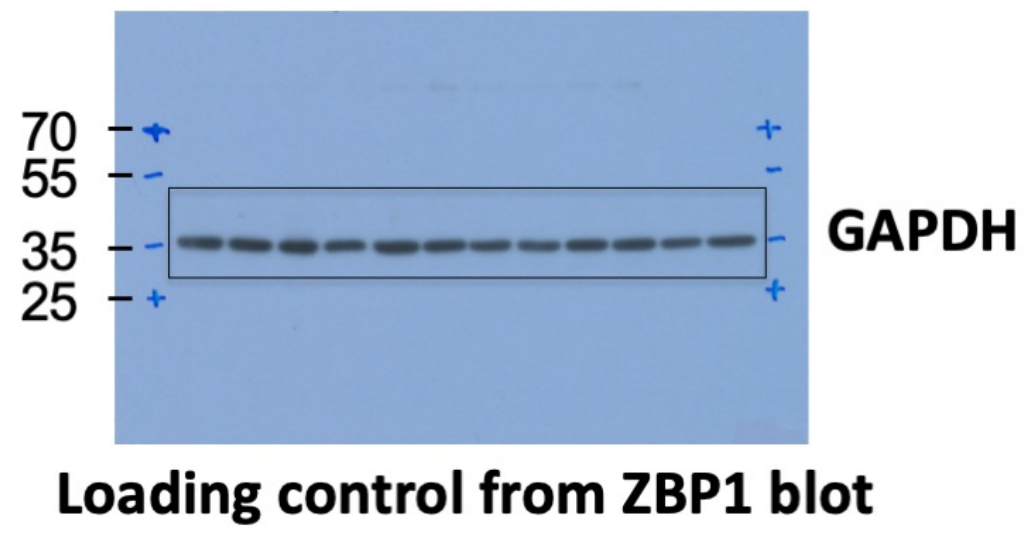



ED Figure 6e

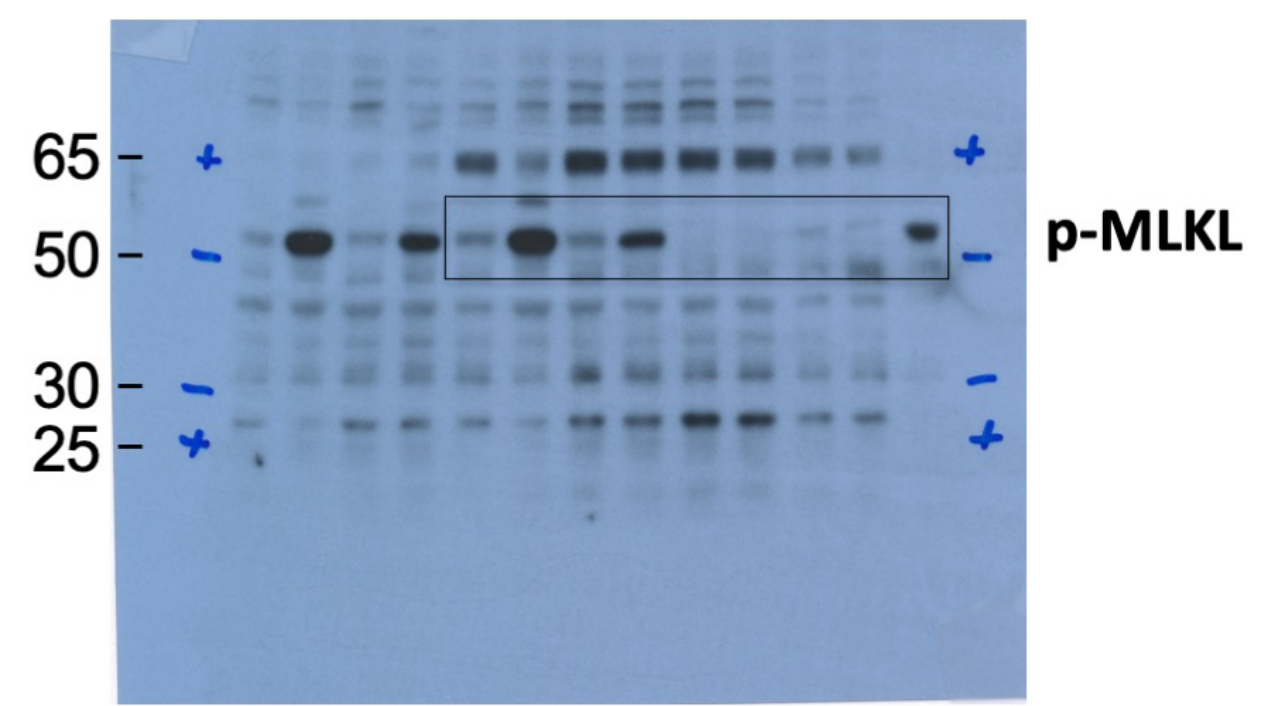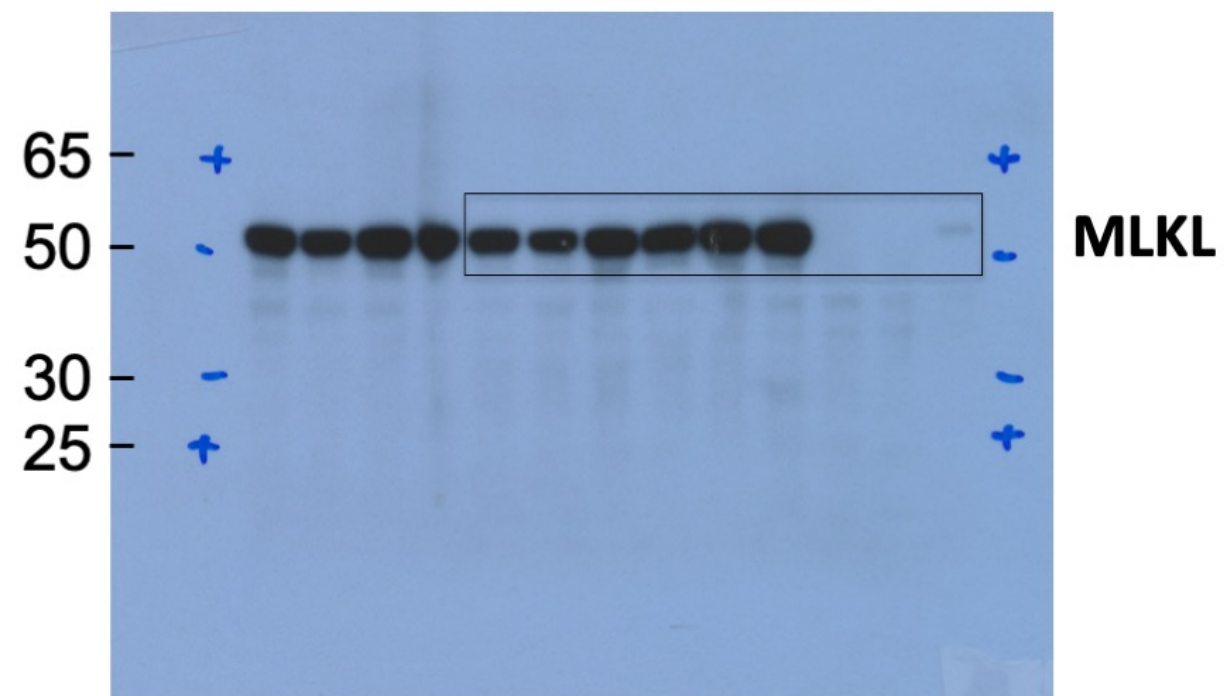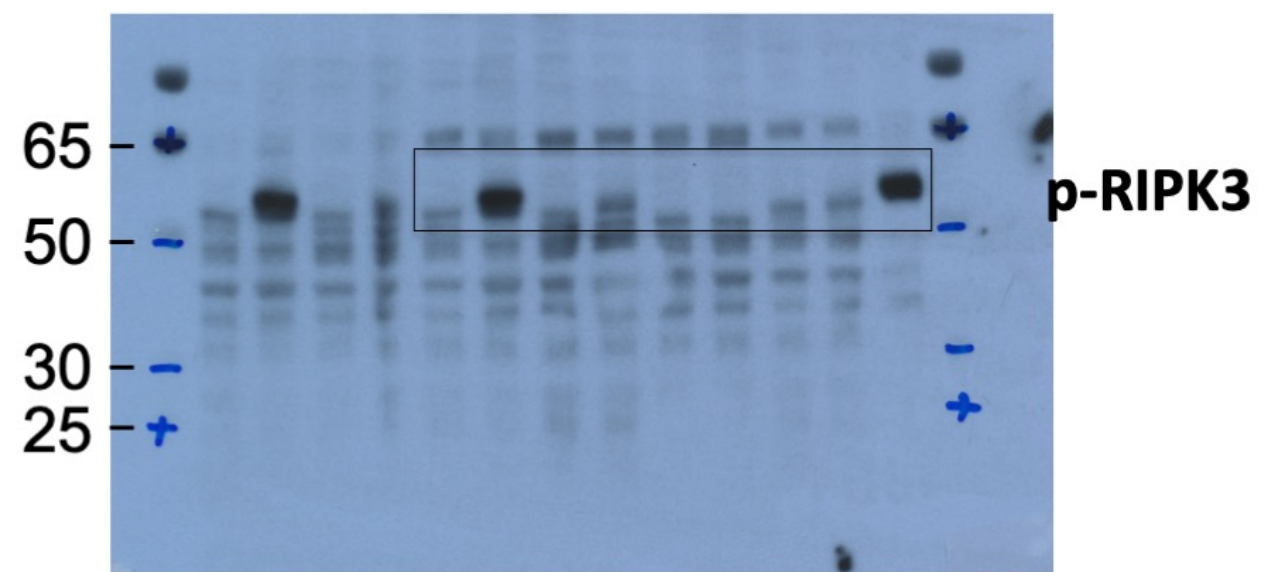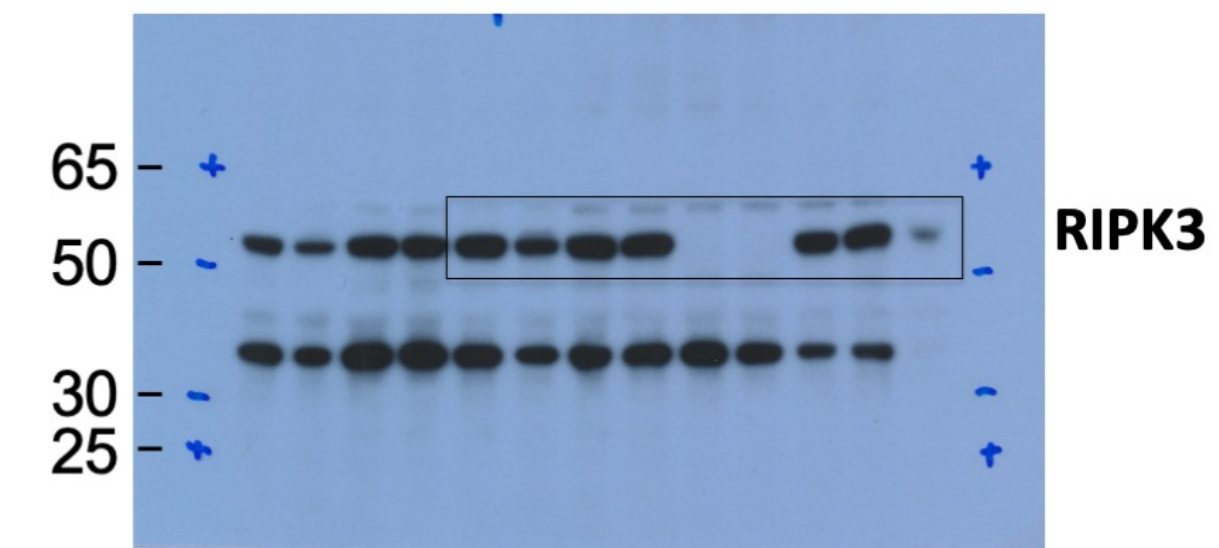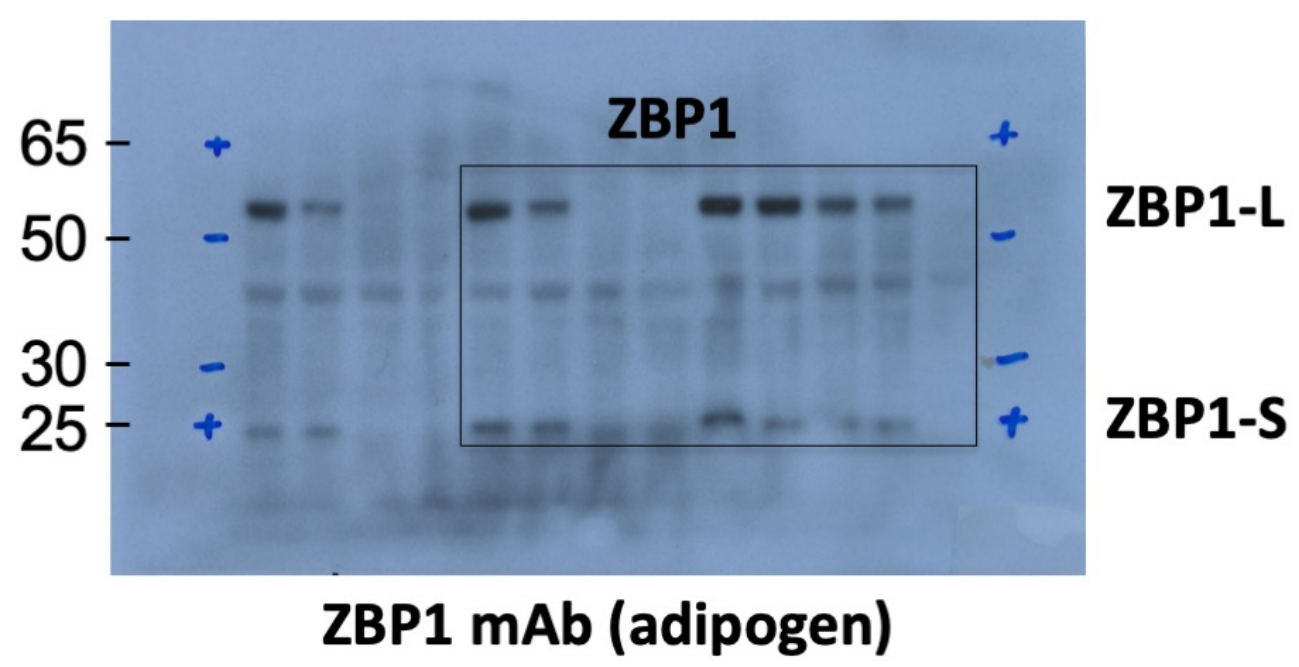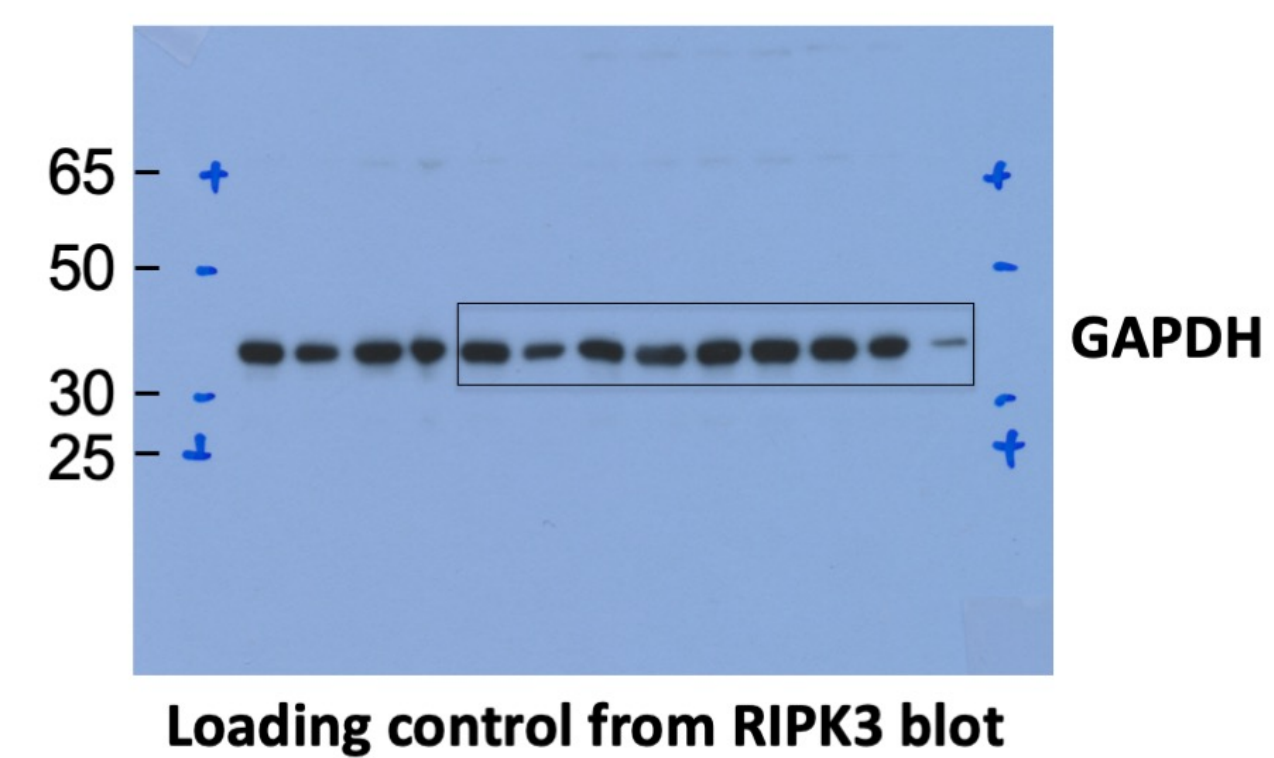

ED Figure 6g

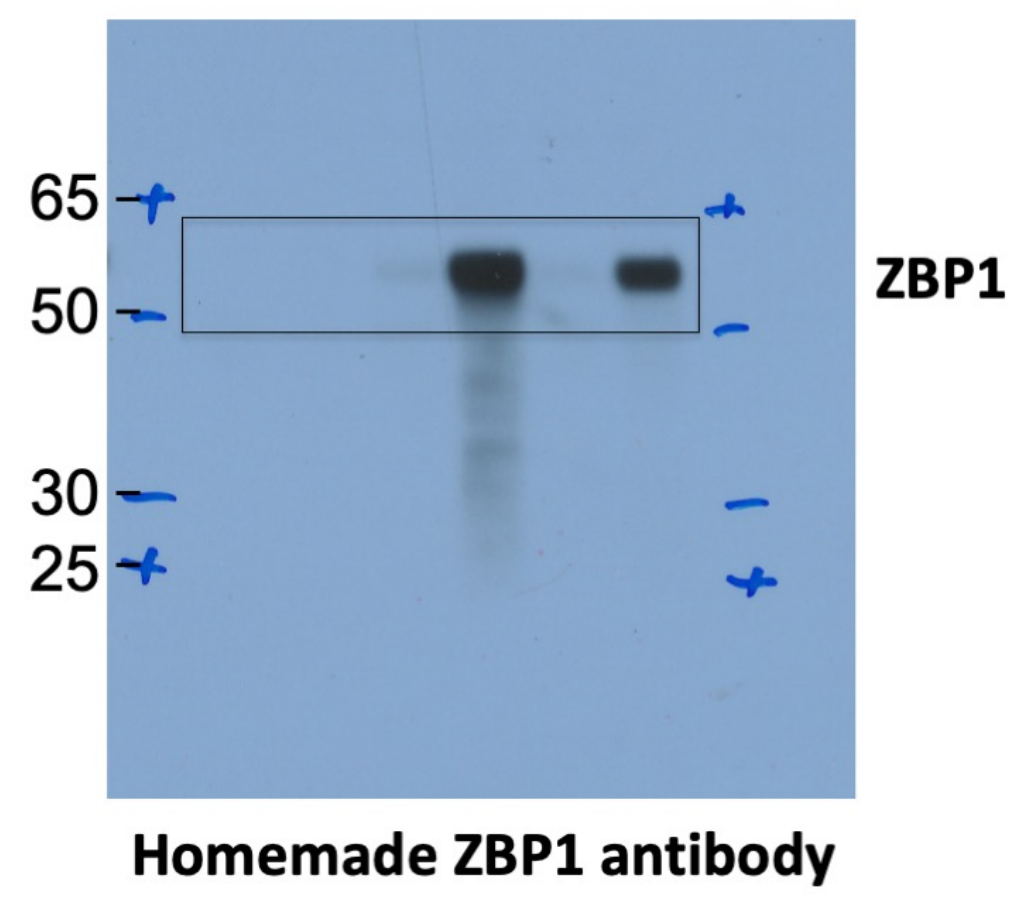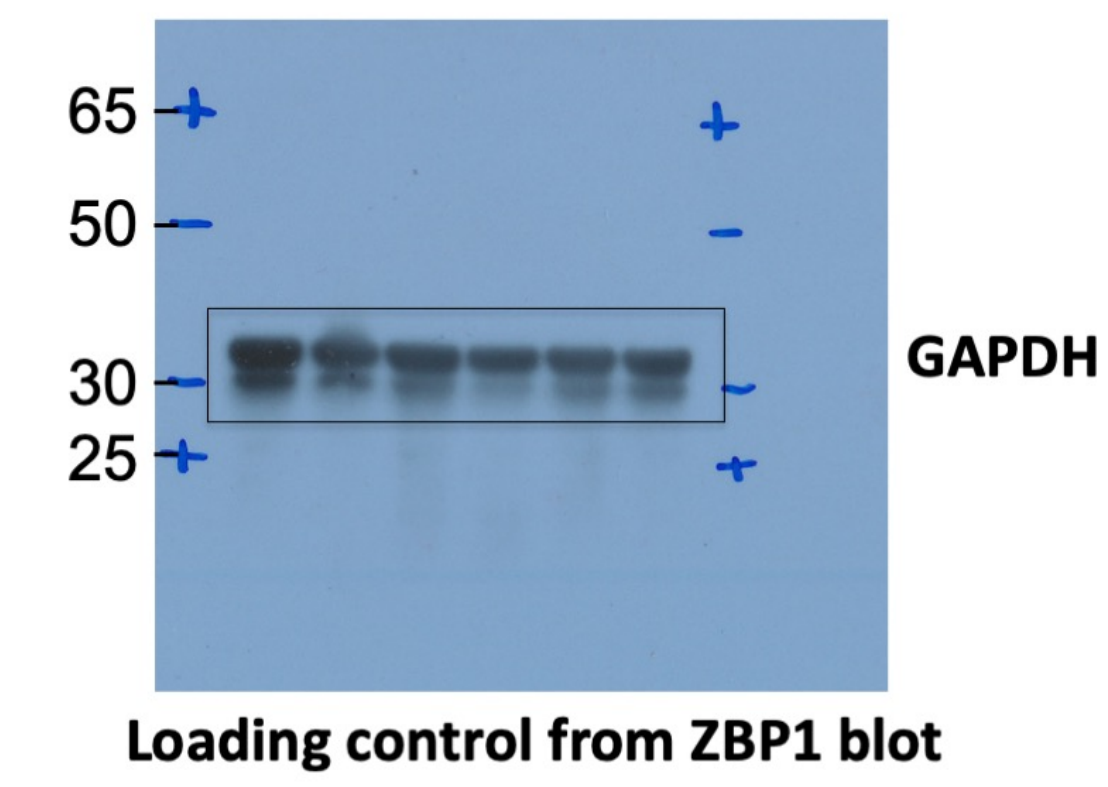



ED Figure 9a

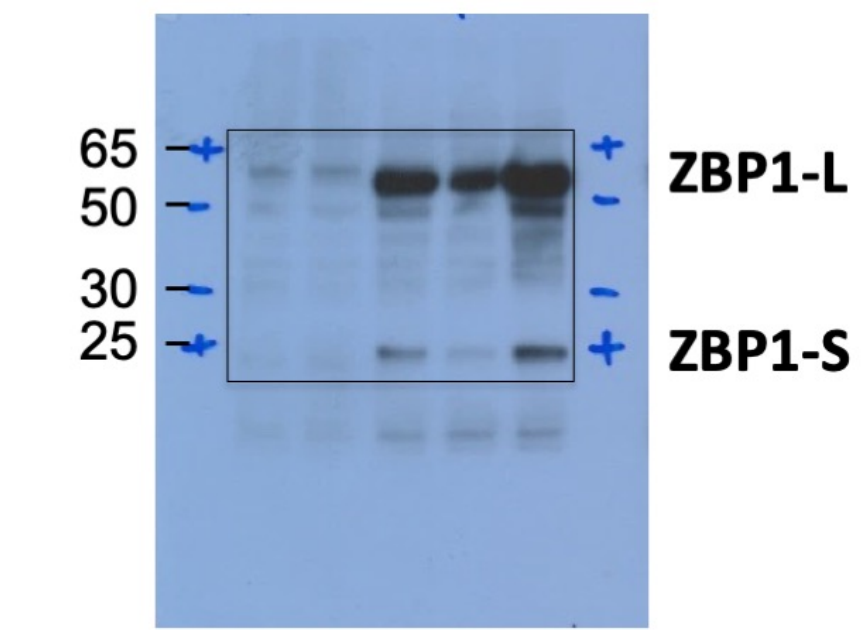

ZBP1 mAb (adipogen)

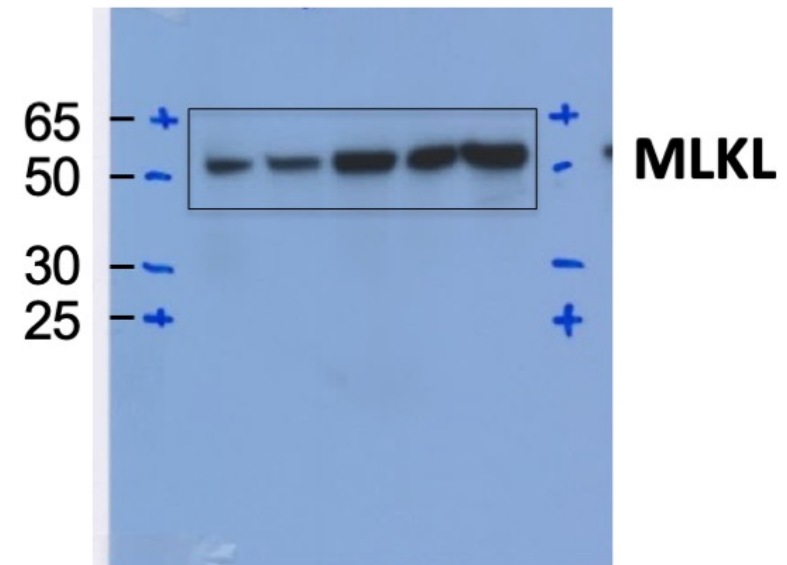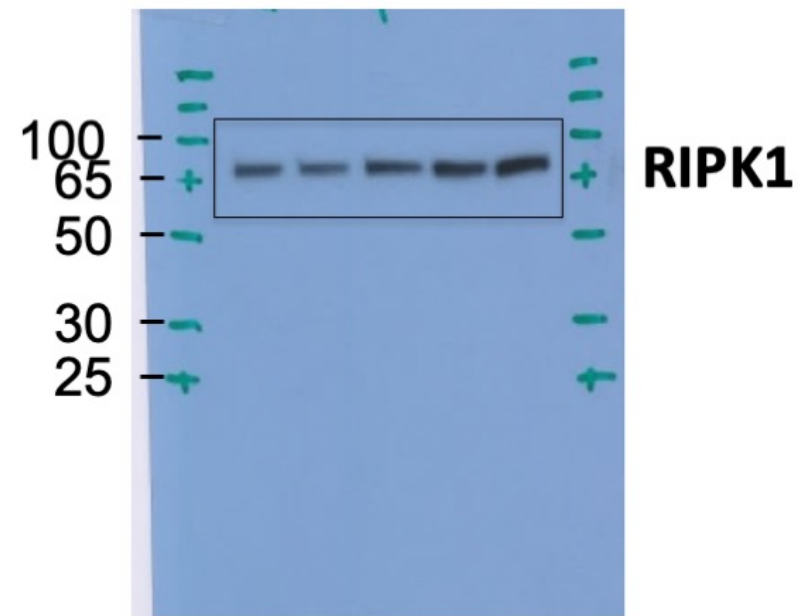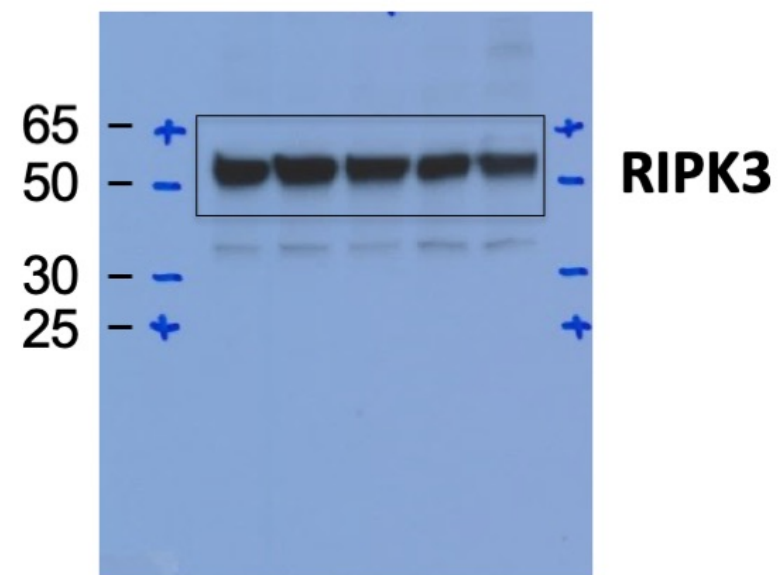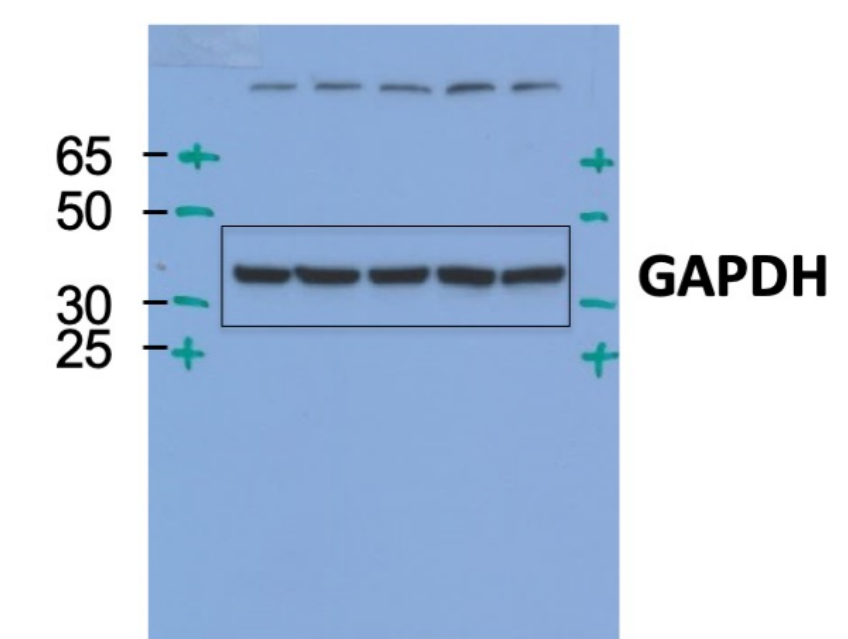

Loading control from ZBP1 blot

ED Figure 9j

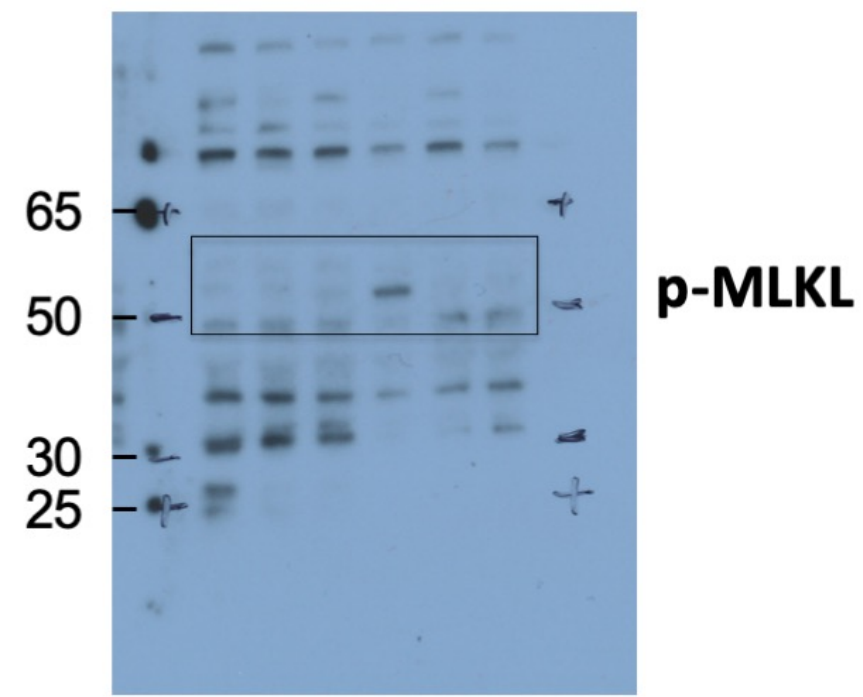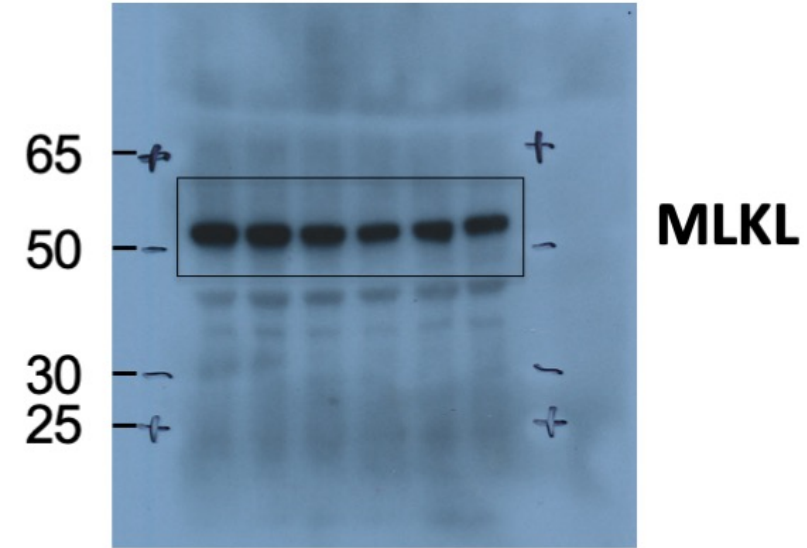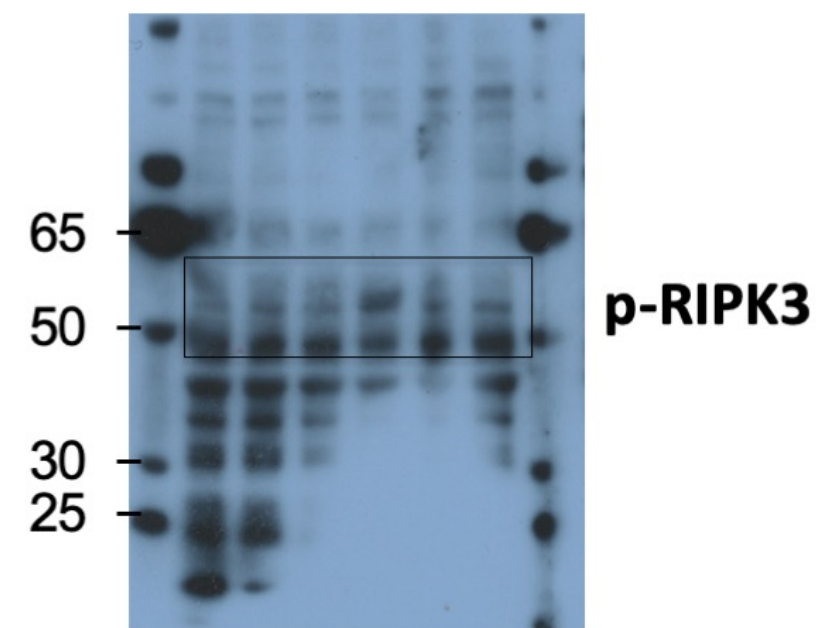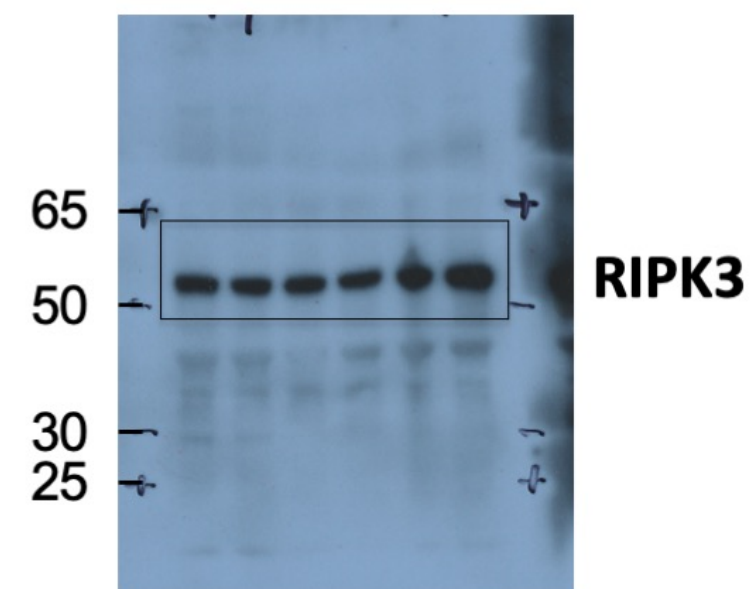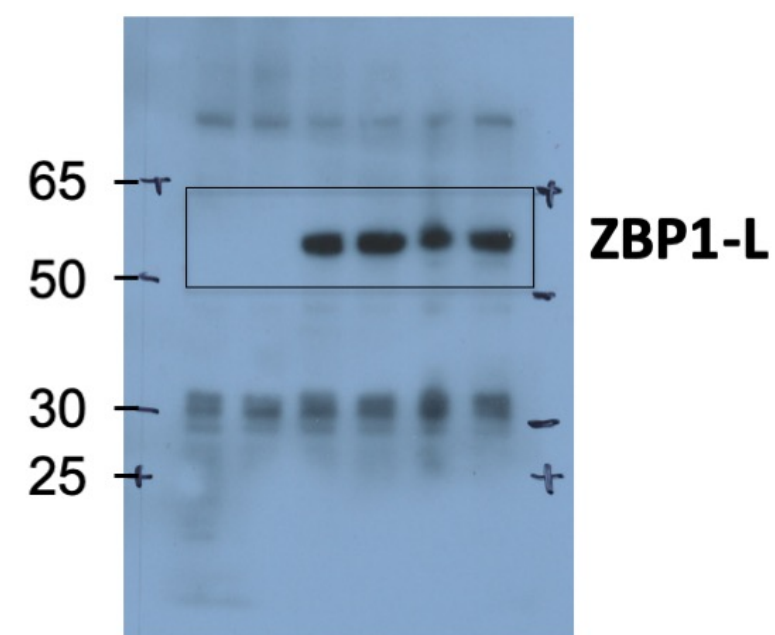

Homemade ZBP1 antibody

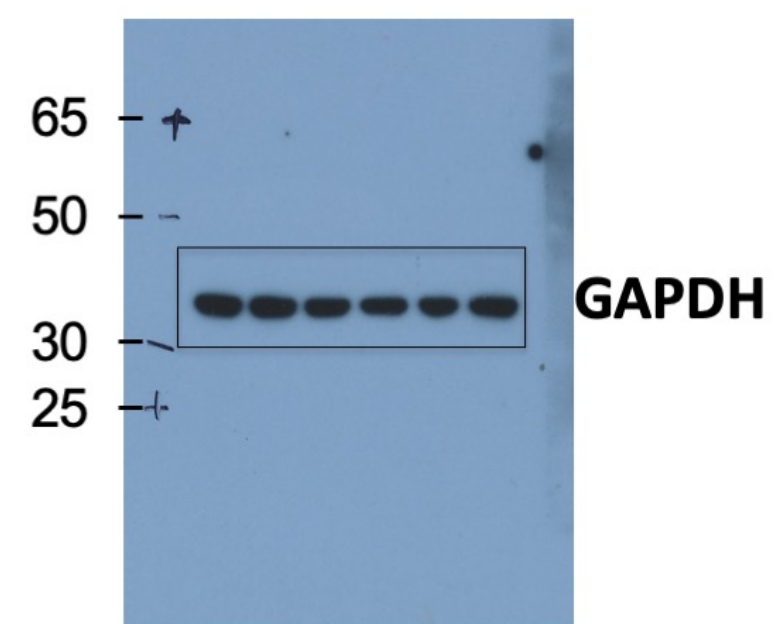

Loading control from RIPK3 blot
